# Supplementary material
Source: PubMed Central journal article supplement (PMC2679264)
Supplement: NIHMS101695-supplement-supplement_1.pdf [file NIHMS101695-supplement-supplement_1.pdf]

**Table 2: Impact of induced  $\alpha$ -Syn expression on the relative amounts of phosphoprotein.** The intensity of Pro-Q diamond stain or that of Sypro ruby stain was measured by densitometric analysis. Statistical analysis was based on 3 or more sets of experiments and unpaired two-tailed *t* test. SD: standard deviation.

**Table 3:** Characteristics of proteins differentially glycosylated between samples from the induced and non-induced cells.

**Table 4:** Impact of induced  $\alpha$ -Syn expression on the relative amounts of glycoprotein. The intensity of Pro-Q emerald stain or that of Sypro ruby stain was measured by densitometric analysis. Statistical analysis was performed based on 3 or more sets of studies and unpaired two-tailed *t* test. SD: standard deviation.

**Table 5:** Biological functions of proteins differentially phosphorylated and glycosylated in samples from the cells with versus without induced expression of wild-type  $\alpha$ -Syn.

**Supplementary Figure 1: Sub-regions of the Pro-Q diamond stained gels from Figure 4.** Spot numbers indicate phosphoproteins that show a greater than 2 fold difference between the induced and non-induced controls (S-14d versus S-14d, S+28d versus S-28d).

**Supplementary Figure 2: Sub-regions of the Pro-Q emerald stained gels from Figure 6.** Spot numbers indicate glycoproteins that show a greater than 2 fold changes between the TetOff induced and non-induced cells.

**Supplementary table S1:** Demographic data of human subjects.

**Supplementary table S2:** List of proteins identified **a)** by MS/MS using LCQ-Deca XP  
Plus **b)** by nanoLC-ESI-MS/MS using LTQ Orbitrap Hybrid Mass Spectrometer.

ACCEPTED MANUSCRIPT

Supplementary Fig. 1

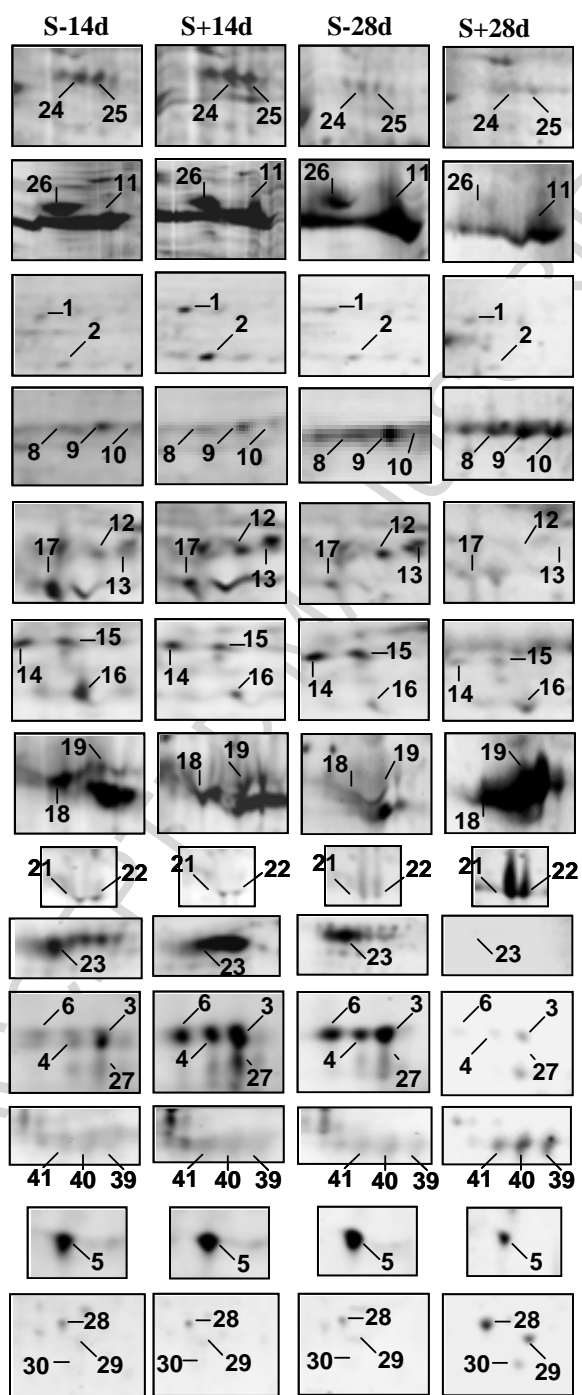

Supplementary Fig. 2

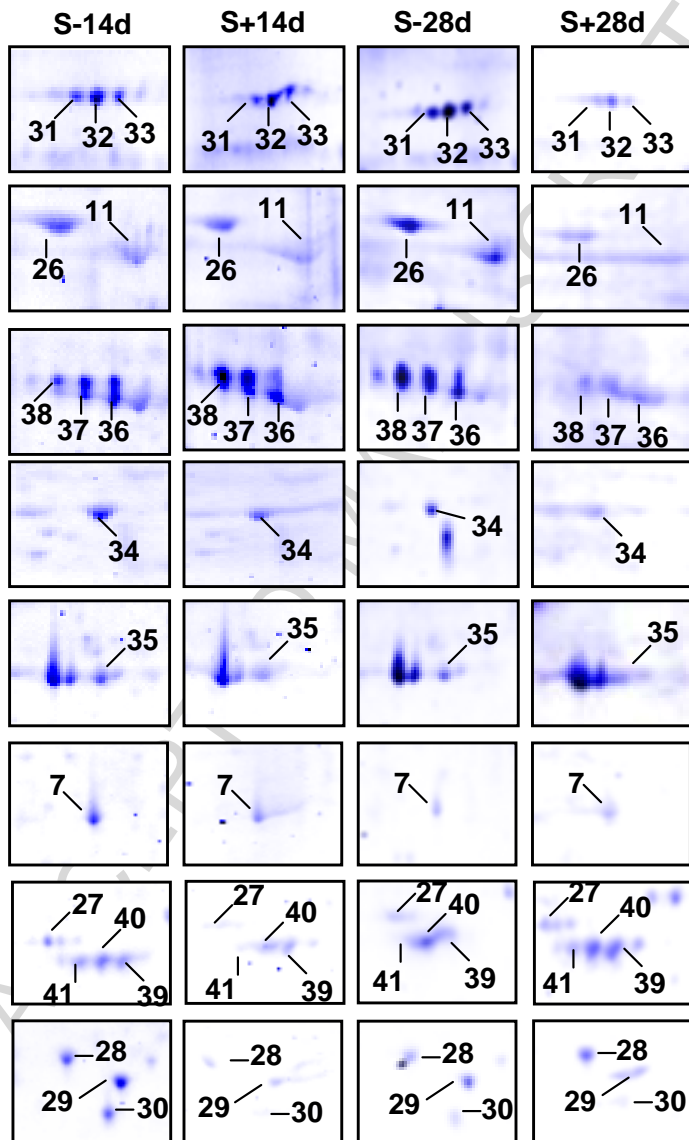

**Supplementary table S1:** Demographic data of human subjects.

| <b>Case</b> | <b>Age (years)</b> | <b>Sex</b> | <b>Clinical Diagnosis</b> | <b>Pathological Diagnosis</b> | <b>Braak stage</b> |
|-------------|--------------------|------------|---------------------------|-------------------------------|--------------------|
| 1           | 88                 | M          | Normal                    | Normal                        | 2                  |
| 2           | 90                 | F          | Normal                    | Normal                        | 1.5                |
| 3           | 81                 | F          | Normal                    | Normal                        | 2                  |
| 4           | 85                 | M          | PD                        | TLBD                          | 2                  |
| 5           | 86                 | M          | PD                        | TLBD                          | 3                  |
| 6           | 82                 | F          | PD                        | TLBD                          | 3                  |

TLBD: transitional Lewy Body disease

| Spot # | Protein Name                                                                                                                                                                                                                                                                                        | P (protein) | Molecular Weight (Da) | Unique peptides | Protein coverage % |
|--------|-----------------------------------------------------------------------------------------------------------------------------------------------------------------------------------------------------------------------------------------------------------------------------------------------------|-------------|-----------------------|-----------------|--------------------|
| 7      | L-lactate dehydrogenase B chain (P07195)<br>Sequence<br>K.LIAPVAEEEEATVPNNK<br>K.SLADELALVDVLEDK<br>K.MVVESAYEVIK                                                                                                                                                                                   | 4.55E-09    | 36507.1               | 3               | 12.61              |
| 11     | Heatshock protein HSP 90-beta (P08238)<br>Sequence<br>R.TLTLVDTGIGMTK<br>K.ADLINNLGTIAK<br>K.HNDDEQYAWESSAGGSFTVR<br>K.HSQFIGYPITLYLEK<br>R.NPDDITQEEYGEFYK<br>K.SLTNDWEDHLAVK<br>K.HFSVEGQLEFR<br>R.GVVDEDLPLNISR<br>K.HLEINPDHPIVETLR                                                             | 6.22E-10    | 83132.5               | 9               | 17.70              |
| 12     | Heat shock cognate 71kDa protein (P11142)<br>Sequence<br>R.TTPSYVAFTDTER<br>K.TVTNAVVTVPAYFNDSQR<br>R.IINEPTAAAIAYGLDK<br>K.SINPDEAVAYGAAVQAAILSGDK                                                                                                                                                 | 2.08E-11    | 70897.6               | 4               | 10.84              |
| 13     | Heat shock cognate 71kDa protein (P11142)<br>Sequence<br>K.VEIIANDQGNR<br>R.TTPSYVAFTDTER<br>K.NQVAMNPTNTVFDAK<br>K.HWPFMVVNDAGRPK<br>K.TVTNAVVTVPAYFNDSQR<br>K.DAGTIAGLNVLR<br>R.IINEPTAAAIAYGLDK<br>R.FEELNADLFR<br>K.SQIHDIVLVGGSTR<br>K.LLQDFFNGK<br>K.SINPDEAVAYGAAVQAAILSGDK<br>K.NSLESYAFNMK | 4.25E-12    | 70897.6               | 12              | 25.70              |
| 14     | Heat shock cognate 71kDa protein (P11142)<br>Sequence<br>R.TTPSYVAFTDTER<br>K.NQVAMNPTNTVFDAK<br>R.IINEPTAAAIAYGLDK<br>K.STAGDTHLGGEDFDNR                                                                                                                                                           | 4.79E-07    | 70897.6               | 4               | 9.29               |

|    |                                                            |          |         |    |       |
|----|------------------------------------------------------------|----------|---------|----|-------|
| 15 | Heat shock 70kDa protein 1 (P08107)                        | 8.24E-11 | 70051.8 | 8  | 17.63 |
|    | Sequence                                                   |          |         |    |       |
|    | R.TTPSYVAFTDTER                                            |          |         |    |       |
|    | K.NQVALNPQNTVFDK                                           |          |         |    |       |
|    | K.HWPFQVINDGDKPK                                           |          |         |    |       |
|    | K.DAGVIAGLNVL                                              |          |         |    |       |
|    | R.IINEPTAAAIAYGLDR                                         |          |         |    |       |
|    | K.LLQDFN                                                   |          |         |    |       |
|    | K.SINPDEAVAYGAAVQAAILMGDK                                  |          |         |    |       |
|    | K.NALESYAFNMK                                              |          |         |    |       |
| 16 | T-complex protein 1 subunit epsilon (P48643)               | 5.36E-11 | 59670.7 | 3  | 9.80  |
|    | Sequence                                                   |          |         |    |       |
|    | K.ISDSVLVDIKDTEPLIQTA                                      |          |         |    |       |
|    | R.WWGGPEIELIAIATGGR                                        |          |         |    |       |
|    | K.LGFAGLVQEISFGTTK                                         |          |         |    |       |
| 17 | 60kDa heat shock protein, mitochondrial precursor (P10809) | 7.96E-13 | 61054.2 | 4  | 14.31 |
|    | Sequence                                                   |          |         |    |       |
|    | K.LVQDVANNTNNEEAGDGTATVLR                                  |          |         |    |       |
|    | K.ISSIQSIVPALEIANAHR                                       |          |         |    |       |
|    | R.KPLVIAEDVDGEALSTLVNLR                                    |          |         |    |       |
|    | R.IQEIIQLDVTTSEYEK                                         |          |         |    |       |
| 21 | Actin (gamma actin) (P63261)                               | 6.11E-15 | 41792.6 | 11 | 41.87 |
|    | Sequence                                                   |          |         |    |       |
|    | K.AGFAGDDAPR                                               |          |         |    |       |
|    | R.AVFPVIVGRPR                                              |          |         |    |       |
|    | K.DSYVGDEAQSK                                              |          |         |    |       |
|    | K.IWHHTFYNELR                                              |          |         |    |       |
|    | R.VAPEEHPVLLTEAPLNPK                                       |          |         |    |       |
|    | R.TTGIVMDSGDGVTHTVPIYEGYALPHAILR                           |          |         |    |       |
|    | R.DLTDYLMK                                                 |          |         |    |       |
|    | R.GYSFTTTAER                                               |          |         |    |       |
|    | K.SYELPDGQVITIGNER                                         |          |         |    |       |
|    | K.DLYANTVLSGGTTMYPGIADR                                    |          |         |    |       |
|    | K.EITALAPSTMK                                              |          |         |    |       |
| 22 | Actin (beta actin) (P60709)                                | 1.16E-11 | 41736.5 | 7  | 31.20 |
|    | Sequence                                                   |          |         |    |       |
|    | K.IWHHTFYNELR                                              |          |         |    |       |
|    | R.VAPEEHPVLLTEAPLNPK                                       |          |         |    |       |
|    | R.TTGIVMDSGDGVTHTVPIYEGYALPHAILR                           |          |         |    |       |
|    | R.GYSFTTTAER                                               |          |         |    |       |
|    | K.SYELPDGQVITIGNER                                         |          |         |    |       |
|    | K.DLYANTVLSGGTTMYPGIADR                                    |          |         |    |       |
|    | K.EITALAPSTMK                                              |          |         |    |       |
| 23 | Nucleophosmin (P06748)                                     | 1.22E-06 | 32574.8 | 2  | 16.67 |
|    | Sequence                                                   |          |         |    |       |

|    |                                                                                                                                                                                                                                                           |          |         |   |       |
|----|-----------------------------------------------------------------------------------------------------------------------------------------------------------------------------------------------------------------------------------------------------------|----------|---------|---|-------|
|    | R.TVSLGAGAKDELHIVEAEAMNYEGSPIK<br>K.MSVQPTVSLGGFEITPPVVL                                                                                                                                                                                                  |          |         |   |       |
| 24 | Transitional endoplasmic reticulum ATPase (P55072)<br>Sequence<br>R.LIVDEAINEDNSVVSLSQPK<br>R.AVANETGAFFFLINGPEIMSK<br>K.NAPAIIFIDELDAIPK<br>R.IVSQLLTLM DGLK<br>R.LDQLIYIPLPEK                                                                           | 2.02E-08 | 89190.1 | 5 | 10.43 |
| 25 | Transitional endoplasmic reticulum ATPase (P55072)<br>Sequence<br>R.LIVDEAINEDNSVVSLSQPK<br>R.IVSQLLTLM DGLK<br>R.LDQLIYIPLPEK<br>R.QTNPSAMEVEEDDPVPEIR                                                                                                   | 1.00E-08 | 89190.1 | 4 | 8.07  |
| 26 | Endoplasmin precursor (HSP90 beta member) (P14625)<br>Sequence<br>R.TDDEVVQREEEAIQLDGLNASQIR<br>K.FAFQAEVNR<br>R.ELISNASDALDK<br>R.LISLTDENALSGNEELTVK<br>K.NLLHVTDGTGVMTR<br>K.EEASDYLELDTIK<br>K.SILFVPTSAPR<br>K.GVVDSDDLPLNVS<br>R.FQSSHPTDITSLDQYVER | 1.33E-10 | 92468.2 | 9 | 16.81 |
| 27 | 14-3-3 protein epsilon (P62258)<br>Sequence<br>K.VAGMDVELTVEER<br>R.LGLALNFSVFYIEILNSPDR<br>K.AAFDDAIAELDTLSEESYK                                                                                                                                         | 2.41E-10 | 29173.7 | 3 | 20.39 |
| 28 | Ubiquitin carboxy-terminal hydrolase isozyme (P09936)<br>Sequence<br>MQLKPMEINPEMLNK<br>R.LGVAGQWR<br>K.QIEELKGQEVSPK<br>K.LGFEDGSVLK<br>R.VDDKVNFFHILFNNVDGHL YELDGR<br>K.VNFFHILFNNVDGHL YELDGR<br>R.MFPFVNHGASSEDLLK                                   | 6.84E-14 | 24824.2 | 7 | 39.46 |
| 29 | Glutathione S-transferase P (P09211)<br>Sequence<br>PPYTVVYFPVR<br>K.FQDGLTLYQSNTILR                                                                                                                                                                      | 3.55E-15 | 23224.5 | 6 | 40.67 |



K.DQQAALVDMVNDGVEDLR  
K.ALPGQLKPFETLLSQNQQGK  
K.AFLASPEYVNLPIPINGNK  
K.AFLASPEYVNLPIPINGNKQ

|    |                          |          |         |   |       |
|----|--------------------------|----------|---------|---|-------|
| 30 | Peroxiredoxin-2 (P32119) | 3.18E-11 | 21760.6 | 6 | 28.43 |
|    | Sequence                 |          |         |   |       |
|    | K.ATAVVDGAFK             |          |         |   |       |
|    | R.KEGGLGPLNIPLLADVTR     |          |         |   |       |
|    | K.EGGLGPLNIPLLADVTR      |          |         |   |       |
|    | R.LSEDYGVLK              |          |         |   |       |
|    | R.GLFIIDGK               |          |         |   |       |
|    | R.QITVNDLPVGR            |          |         |   |       |

ACCEPTED MANUSCRIPT

| Spot # | Protein name                                                                                                                                                                                                                                                                                                                                        | Protein molecular weight (Da) | Protein identification probability | Number of unique peptides | Percentage sequence coverage |
|--------|-----------------------------------------------------------------------------------------------------------------------------------------------------------------------------------------------------------------------------------------------------------------------------------------------------------------------------------------------------|-------------------------------|------------------------------------|---------------------------|------------------------------|
| 3      | Elongation factor 1-beta (P24534)<br>sequence:<br>AKKPALVAK<br>GPADVEDTTGSGATDSK<br>LAQYESK<br>SIQADGLVWGSSK<br>SPAGLQVLNDYLADK<br>SSILLDVK<br>SSILLDVKPWDEETDMAK<br>SYIEGYVPSQADVAVF<br>SYIEGYVPSQADVAVFEAVSSPPPADLCH<br>VGTDMLEEQITAFEDYVQSM DVAAFNK<br>VGTDMLEEQITAFEDYVQSM DVAAFNKI<br>VVEDDKVGTDMLEEQITAFEDYVQSM DVAAFNK<br>YGPADVEDTTGSGATDSK | 24,746.20                     | 100.00%                            | 13                        | 63.60%                       |
| 4      | Elongation factor 1-beta (P24534)<br>sequence:<br>AKKPALVAK<br>GPADVEDTTGSGATDSK<br>LAQYESK<br>SIQADGLVWGSSK<br>SPAGLQVLNDYLADK<br>SSILLDVK<br>SSILLDVKPWDEETDMAK<br>SYIEGYVPSQADVAVF<br>VGTDMLEEQITAFEDYVQSM DVAAFNK<br>YGPADVEDTTGSGATD                                                                                                           | 24,746.20                     | 100.00%                            | 11                        | 54.70%                       |
| 5      | Proteasome subunit alpha type-3 (P25788)<br>sequence:<br>AFELELSWVGELTNGR<br>AVENSSTAIGIR                                                                                                                                                                                                                                                           | 28,415.70                     | 100.00%                            | 15                        | 50.20%                       |

CKDGVVFGVEK  
 DGVVFGVEK  
 EEASNFR  
 HVGMAVAGLLADAR  
 IYIVHDEVK  
 IYIVHDEVKDK  
 LYEEGSNK  
 LYEEGSNKR  
 RLFNVDR  
 SNFGYNIPLK  
 TEIEKLQMK  
 VFQVEYAMK  
 YDLSASTFSPDGR

|    |                                                                                                                                                                                                              |            |         |    |        |
|----|--------------------------------------------------------------------------------------------------------------------------------------------------------------------------------------------------------------|------------|---------|----|--------|
| 6  | Elongation factor 1-beta (P24534)<br>sequence:                                                                                                                                                               | 24,746.20  | 100.00% | 9  | 64.40% |
|    | AKKPALVAK<br>LAQYESK<br>SIQADGLVWGSSK<br>SPAGLQVLNDYLADK<br>SSILLDVKPWDDETDMAK<br>SYIEGYVPSQADVAVFEAVSSPPPADLCHALR<br>VGTDMLEEQITAFEDYVQSMDVAAFNK<br>VVEDDKVGTDMLEEQITAFEDYVQSMDVAAFNK<br>YGPADVEDTTGSGATDSK |            |         |    |        |
| 31 | Neutral alpha-glucosidase AB precursor (Q14697)<br>sequence:                                                                                                                                                 | 106,857.90 | 100.00% | 59 | 60.30% |
|    | AAETWVDISSNTAGK<br>AEKDEPGAWEEETFK<br>AFFAGSQR<br>ALLDSLQLGPDSLTVHLLIHEVTK<br>DENSVELTMAEGPYK<br>DGDKPEETQGK<br>DLGIFWLNAETWVDISSNTAGK<br>DPAEGDGAQPEETPR<br>DPAEGDGAQPEETPRD                                |            |         |    |        |

DPAEGDGAQPEETPRDGDKPEETQGK  
DVHNIYGLYVHMATADGLR  
FGAVWTGDNTAEWDHLK  
FQHDPETSVLVLRL  
FRIDELEPR  
FSFSGNTLVSSADPEGHFETPIWIER  
GAGKPAAVVLQTK  
GLLEFEHQR  
IDELEPR  
IGAGKPAAVVLQTK  
IIGAGKPAAVVLQTK  
ISIPMCLSLGLVGLSFCGADVGGFFK  
KLVAIVDPHIK  
LGPDSLTVHLIHEVTK  
LKVTEGGEPYR  
LSFQHDPETSVLVLRL  
LVAIVDPHIK  
LYNLDFVQYELYNPM  
LYNLDFVQYELYNPMALYGSVPVLLAHNPH  
LYNLDFVQYELYNPMALYGSVPVLLAHNPHR  
MMDYLQGSGETPQTDVR  
NDMNEPSVFNNGPEVTMLK  
NPEPELLVR  
PAAVVLQTK  
PAAVVLQTKGSPESR  
PAEGDGAQPEETPR  
PGLSPYR  
PGSAGYPDFTNPTMR  
PPLFSLGYHQSR  
QYASLTGTQALPPLFSLGYHQSR  
RFSFSGNTLVSSAD  
SGGMERPFVLAR  
SIRPGLSPYR  
SLLLSVNAR  
SYDNYEGSAPNLFVWVNDMNEPSVFNNGPEVTMLK  
TCEESSFCK  
TLVSSADPEGHFETPIWIER

VALSPQGT AQGELFLDDGHTFN YQTR  
 VHEELR  
 VIIGAGKPAAVVLQTK  
 VLLVLELQGLQK  
 VPDVLVADPPIAR  
 VSQGSKDPAEGDGAQPEETPR  
 VTEGGEPYR  
 VVIIGAGKPAAVVLQTK  
 WMSETGIIDVFLLLGPSISDVFR  
 WYQMGAYQPFFR  
 YFTWDPSR  
 YRVPDVLVADPPIAR  
 YSLLPFWYTL LYQAHR

|    |                                                              |            |         |    |        |
|----|--------------------------------------------------------------|------------|---------|----|--------|
| 32 | Neutral alpha-glucosidase AB precursor (Q14697)<br>sequence: | 106,857.90 | 100.00% | 76 | 63.20% |
|    | AAETWVDISSNTAGK                                              |            |         |    |        |
|    | AEKDEPGAWEEFK                                                |            |         |    |        |
|    | AFFAGSQR                                                     |            |         |    |        |
|    | ALLDSLQLGPDSLTVH                                             |            |         |    |        |
|    | ALLDSLQLGPDSLTVH LIHEVTK                                     |            |         |    |        |
|    | ASLTGTQALPPLFSLGYHQSR                                        |            |         |    |        |
|    | DENSVELTMAEGPYK                                              |            |         |    |        |
|    | DGDKPEETQGK                                                  |            |         |    |        |
|    | DLGIFWL NAAETWVDISSNTAGK                                     |            |         |    |        |
|    | DPAEGDGAQPEETPR                                              |            |         |    |        |
|    | DPAEGDGAQPEETPRD                                             |            |         |    |        |
|    | DVHNIYGLYVH                                                  |            |         |    |        |
|    | DVHNIYGLYVH MATADGLR                                         |            |         |    |        |
|    | EPWLLPSQHNDIIR                                               |            |         |    |        |
|    | FGAVWTGDNTAEWDHLK                                            |            |         |    |        |
|    | FQHDPETSVLVLR                                                |            |         |    |        |
|    | FRIDELEPR                                                    |            |         |    |        |
|    | FSFSGNTLVSSADPEGHFETPIWIER                                   |            |         |    |        |
|    | GLLEFEHQK                                                    |            |         |    |        |
|    | HHGPQTL YLPVTLSSIPVFQR                                       |            |         |    |        |
|    | IDELEPR                                                      |            |         |    |        |

IGAGKPAAVVLQTK  
IIGAGKPAAVVLQTK  
ISIPMCLSLGLVGLSFCGADVGGFFK  
KLVAIVDPH  
KLVAIVDPHIK  
KPGINVASDWSIHLR  
LFVWNDMNEPSVFNGPEVTK  
LGPDSLTVHLIHEVTK  
LKVTEGGEPYR  
LLLGPSISDVFR  
LSFQHPETSVLVLR  
LVAIVDPHIK  
LYNLDVFQYELYNPMALYGSVPVLLAHNPH  
LYNLDVFQYELYNPMALYGSVPVLLAHNPHR  
MMDYLQGSGETPQTDVR  
NDMNEPSVFNGPEVTK  
NIYGLYVHMATADGLR  
NLGLYVK  
NPEPELLVR  
PAAVVLQTK  
PAAVVLQTKGSPESR  
PAEGDGAQPEETPR  
PDSLTVHLIHEVTK  
PFWYTLLYQAHR  
PGLSPYR  
PMALYGSVPVLLAHNPHR  
PPLFSLGYHQSR  
QYASLTGTQALPPLFSLGYHQSR  
REPWLLPSQHNDIIR  
RFSFGNTLVSSAD  
SGGMERPFVLAR  
SGNTLVSSADPEGHFETPIWIER  
SIRPGLSPYR  
SLLLSVNAR  
SPQGTAQGELFLDDGHTFNYQTR  
SYDNYEGSAPNLFVWNDMNEPSVFNGPEVTK  
TLVSSADPEGHFETPIWIER

VALSPQGT AQGELFLDDGHTFNYQTR  
 VIIGAGK PAAVVLQTK  
 VLLVLELQGLQK  
 VPDVLVADPPIAR  
 VSQGSKDPAEGDGAQPEETPR  
 VTEGGEPYR  
 VVIIGAGK  
 VVIIGAGK PAAVVLQTK  
 WLNAETWVDISSNTAGK  
 WMSETGIIDVFLLLGPSISDVFR  
 WYQMGAYQPFFR  
 YFTWDPSR  
 YGLYVHMATADGLR  
 YLPVTLSSIPVFQR  
 YLQSGGETPQTDVDR  
 YRVPDVLVADPPIAR  
 YSLLPFWYTLLYQAH  
 YSLLPFWYTLLYQAHR

|    |                                                              |            |         |    |        |
|----|--------------------------------------------------------------|------------|---------|----|--------|
| 33 | Neutral alpha-glucosidase AB precursor (Q14697)<br>sequence: | 106,857.90 | 100.00% | 49 | 55.20% |
|    | AFFAGSQR                                                     |            |         |    |        |
|    | AHAHLDTGR                                                    |            |         |    |        |
|    | ALLDSLQLGPD SLTVHLIHEVTK                                     |            |         |    |        |
|    | DENSVELTMAEGPYK                                              |            |         |    |        |
|    | DGDKPEETQGK                                                  |            |         |    |        |
|    | DLGIFWLNAETWVDISSNTAGK                                       |            |         |    |        |
|    | DPAEGDGAQPEETPR                                              |            |         |    |        |
|    | DVHNIYGLYVHMATADGLR                                          |            |         |    |        |
|    | FGAVWTGDNTAEWDHLK                                            |            |         |    |        |
|    | FRIDELEPR                                                    |            |         |    |        |
|    | FSFSGNTLVSSADPEGHFETPIWIER                                   |            |         |    |        |
|    | GLLEFEHQR                                                    |            |         |    |        |
|    | HHGPQTL YLPVTLSSIPVFQR                                       |            |         |    |        |
|    | IDELEPR                                                      |            |         |    |        |
|    | IGAGK PAAVVLQTK                                              |            |         |    |        |
|    | IIGAGK PAAVVLQTK                                             |            |         |    |        |

ISIPMCLSLGLVGLSFCGADVGGFFK  
 KLVAIVDPH  
 KLVAIVDPHIK  
 KPGINVASDWSIHLR  
 LGPDSLTVHLIHEVTK  
 LSFQHDPETSVLVR  
 LVAIVDPHIK  
 LYNLDVFQYELYNPMALYGSVPVLLAHNPHR  
 MMDYLQGSGETPQTDVR  
 NPEPELLVR  
 PAAVVLQTK  
 PAEGDGAQEETPR  
 PDSLTVHLIHEVTK  
 PGLSPYR  
 PMALYGSVPVLLAHNPHR  
 QYASLTGTQALPPLFSLGYHQSR  
 REPWLLPSQHNDIIR  
 RFSFSGNTLVSSSAD  
 SGGMERPFVLAR  
 SIRPGLSPYR  
 SLLSVNAR  
 VALSPQGTAQGELFLDDGHTFNYQTR  
 VIIGAGKPAAVVLQTK  
 VLLVLELQGLQK  
 VPDVLVADPPIAR  
 VSQGSKDPAEGDGAQEETPR  
 VTEGGEPYR  
 VVIIGAGK  
 VVIIGAGKPAAVVLQTK  
 WYQMGAYQPFFR  
 YFTWDPSR  
 YRVPDVLVADPPIAR  
 YSLLPFWYTLLYQAHR

|    |                                                                                    |           |         |    |        |
|----|------------------------------------------------------------------------------------|-----------|---------|----|--------|
| 34 | Protein disulfide-isomerase A3 precursor (P30101)<br>sequence:<br>DASIVGFFDDSFSEAH | 56,766.60 | 100.00% | 52 | 73.70% |
|----|------------------------------------------------------------------------------------|-----------|---------|----|--------|



DASIVGFFDDSFSEAHSEFLK  
DGEEAGAYDGPR  
DLLIAYYDVYK  
DPNIVIAK  
DVLELTDDNFESR  
EATNPPVIQEEK  
EATNPPVIQEEKPK  
EATNPPVIQEEKPKK  
ELSDFGLESTAGEIPVVAIR  
ELSDFISYLQR  
FAHTNVESLVNEYDDNGEGILFR  
FDDSFSEAHSEFLK  
FFDDSFSEAHSEFLK  
FIQENIFGICPHMTEDNKDLIQGK  
FISDKDASIVGFFDDSFSEAH  
FISDKDASIVGFFDDSFSEAHSEFLK  
FLDAGHKLNFASR  
FLQDYFDGNLK  
FLQDYFDGNLKR  
FVMQEEFSR  
FVMQEEFSRDGK  
GFFDDSFSEAHSEFLK  
GFPTIYFSPANK  
GFPTIYFSPANKK  
ISDTGSAGLMLVEF  
ISDTGSAGLMLVEFFAPWCGH  
IVGFFDDSFSEAHSEFLK  
KFLDAGHK  
KQAGPASVPLR  
LAPEYAAAATR  
LNFAVASR  
LSKDPNIVIAK  
MDATANDVPSPYEVR  
MTEDNKDLIQGK  
PSHLTNK  
PSHLTNKFEDK  
QAGPASVPLR

ACCEPTED MANUSCRIPT

RLAPYEAAATR  
 SDKDASIVGFFDDSFSEAHSEFLK  
 SEPIPESNDGPVK  
 SIVGFFDDSFSEAHSEFLK  
 TADGIVSHLK  
 TADGIVSHLKK  
 TEEEFKK  
 TFSHELSDFGLESTAGEIPVVAIR  
 TVAYTEQK  
 VDCTANTNTCNK  
 VGFFDDSFSEAHSEFLK  
 VLELTDDNFESR  
 VVVAENFDEIVNNENK  
 YGVSGYPTLK

|    |                                 |           |         |    |        |
|----|---------------------------------|-----------|---------|----|--------|
| 35 | Actin, cytoplasmic 1 (P84336)   | 41,784.90 | 100.00% | 37 | 74.40% |
|    | sequence:                       |           |         |    |        |
|    | AGFAGDDAPR                      |           |         |    |        |
|    | ANTVLSGGTTMYPGIADR              |           |         |    |        |
|    | APEEHPVLLTEAPLNPK               |           |         |    |        |
|    | AVFPSIVGR                       |           |         |    |        |
|    | AVFPSIVGRPR                     |           |         |    |        |
|    | CDVDIR                          |           |         |    |        |
|    | DLTDYLMK                        |           |         |    |        |
|    | DLTDYLMKILTER                   |           |         |    |        |
|    | DLYANTVLSGGTTMYPGIADR           |           |         |    |        |
|    | DSYVGDEAQS                      |           |         |    |        |
|    | EEHPVLLTEAPLNPK                 |           |         |    |        |
|    | EITALAPSTMK                     |           |         |    |        |
|    | EKMTQIMFETFNTPAMYVAIQAVLSLYASGR |           |         |    |        |
|    | ELPDGQVITIGNER                  |           |         |    |        |
|    | FEQEMATAASSSSLEK                |           |         |    |        |
|    | GIHETTFNSIMK                    |           |         |    |        |
|    | GIVTNWDDMEK                     |           |         |    |        |
|    | GVTHTVPIYEGYALPHAILR            |           |         |    |        |
|    | GYSFTTTAER                      |           |         |    |        |

HQGVMVGMGQK  
 IIAPPERK  
 IWHHTFYNELR  
 KDLYANTVLSGGTTMYPGIADR  
 LCYVALDFEQEMATAASSSSLEK  
 LDFEQEMATAASSSSLEK  
 NTPAMYVAIQAVLSLYASGR  
 PEEHPVLLTEAPLNPK  
 PIYEGYALPHAILR  
 QEYDESGPSIVHR  
 SYELPDGQVITIGNER  
 TTGIVMDSGDGVTH  
 TTGIVMDSGDGVTHTVPIYEGY  
 TTGIVMDSGDGVTHTVPIYEGYALPH  
 TTGIVMDSGDGVTHTVPIYEGYALPHAILR  
 TVLSGGTTMYPGIADR  
 VALDFEQEMATAASSSSLEK  
 VAPEEHPVLLTEAPLNPK

|    |                                                         |           |         |    |        |
|----|---------------------------------------------------------|-----------|---------|----|--------|
| 36 | Heat shock cognate 71 kDa protein (P19378)<br>sequence: | 70,881,80 | 100.00% | 42 | 70.70% |
|----|---------------------------------------------------------|-----------|---------|----|--------|

AGDTHLGGEDFDNR  
 ARFEELNADLFR  
 DAGTIAGLNVLR  
 DNNLLGK  
 EEFHQK  
 FDDAVVQSDMK  
 FEELNADLFR  
 GAAVQAAILSGDK  
 GDTHLGGEDFDNR  
 GPAVGIDLGTTYSCVGVFQHGK  
 GTLDPVEK  
 GVPQIEVTFDIDANGILNVSVDK  
 HWPFMVNDAGR  
 HWPFMVNDAGRPK  
 IINEPTAAAIAYGLDK  
 LIGDAAKNQVAMNPTNTVFDK

LLQDFNKG  
 LSKEDIER  
 LYQSAGGMPGGMPGGFPGGGAPPSGGASSGPTIEEVD  
 MKEIAEAYLGK  
 MVNHFAEFK  
 NEPTAAAIAYGLDK  
 NEPTAAAIAYGLDKK  
 NPDEAVAYGAAVQAAILSGDK  
 NQTAEKEEFEHQK  
 NQVAMNPTNTVFDAK  
 NSLESYAFNMK  
 NVLIFDLGGGTFDVSILTIEDGIFEVK  
 PFMVVNDAGRPK  
 QTQTFTTYSDNQPGVLIQVYGER  
 RFDDAVVQSDMK  
 SENVQDLLLDDVTPSLGIETAGGVMTVLIK  
 SFYPEEVSSMVLTK  
 SINPDEAVAYGAAVQAAILSGDK  
 SLGIETAGGVMTVLIK  
 SQIHDIVLVGGSTR  
 STAGDTHLGGEDFD  
 STAGDTHLGGEDFDNR  
 TSSSTQASIEIDSLYEGIDFYTSITR  
 TTPSYVAFTDTER  
 TTYSDNQPGVLIQVYGER  
 TVTNAVVTVPAYFNDSQR

|    |                                                                                                                                   |           |         |    |        |
|----|-----------------------------------------------------------------------------------------------------------------------------------|-----------|---------|----|--------|
| 37 | Heat shock cognate 71 kDa protein (P19378)<br>sequence:                                                                           | 70,881.80 | 100.00% | 38 | 70.90% |
|    | AGDTHLGGEDFDNR<br>ARFEELNADLFR<br>DAGTIAGLNVLR<br>DLGGGTFDVSILTIEDGIFEVK<br>EEFEHQK<br>FDDAVVQSDMK<br>FEELNADLFR<br>GAAVQAAILSGDK |           |         |    |        |

GPAVGIDLGTTYSCVGVFQHGK  
 GTLDPVEK  
 GVPQIEVTFDIDANGILNNSAVDK  
 HWPFFMVNDAGRPK  
 IINEPTAAAIAYGLDK  
 IINEPTAAAIAYGLDKK  
 KDISENKR  
 LIGDAAKNQVAMNPTNTVFDK  
 LLQDFFNGK  
 LSKEDIER  
 LYQSAGGMPGGMPGGFPGGGAPPSGGASSGPTIEEVD  
 MKEIAEAYLGK  
 MVNHFAEFK  
 NEPTAAAIAYGLDKK  
 NQTAEKEEFEHQK  
 NQVAMNPTNTVFDK  
 NSLESYAFNMK  
 NVLIFDLGGGTFDVSILTIEDGIFEVK  
 QTQTFTTYSDNQPGVLIQVYEGER  
 RFDDAVVQSDMK  
 SENVQDLLLDVTPSLGIETAGGVMTVLIK  
 SFYPEEVSSMVLTK  
 SINPDEAVAYGAAVQAAILSGDK  
 SLGIETAGGVMTVLIK  
 SQIHDIVLVGGSTR  
 STAGDTHLGGEDFDNR  
 TLSSSTQASIEIDSLYEGIDFYTSITR  
 TTPSYVAFTDTER  
 TTYSNQPGLIQVYEGER  
 TVTNAVVTVPAYFNDSQR

|    |                                                                                                                      |           |         |    |        |
|----|----------------------------------------------------------------------------------------------------------------------|-----------|---------|----|--------|
| 38 | Heat shock cognate 71 kDa protein (P19378)<br>sequence:<br>AGDTHLGGEDFDNR<br>ARFEELNADLFR<br>DAGTIAGLNVLR<br>DNNLLGK | 70,881.80 | 100.00% | 44 | 72.60% |
|----|----------------------------------------------------------------------------------------------------------------------|-----------|---------|----|--------|

EEFEHQK  
EIAEAYLGK  
FDDAVVQSDMK  
FEELNADLFR  
GAAVQAAILSGDK  
GDTHLGGEDFDNR  
GPAVGIDLGTTYSVGVFQHGK  
GTLDPVEK  
GVPQIEVTFDIDANGILNVSVDK  
HWPFMVVNDAGRPK  
IINEPTAAAIYGLDK  
IINEPTAAAIYGLDKK  
KDIENKR  
LIGDAAKNQVAMNPTNTVFDK  
LLQDFNGK  
LYQSAGGMPGGMPGGFPGGGAPSGGASSGPTIEVD  
MKEIAEAYLGK  
MVNHFAEFK  
NEPTAAAIYGLDK  
NEPTAAAIYGLDKK  
NPDEAVAYGAAVQAAILSGDK  
NQTAKEEFEHQK  
NQVAMNPTNTVFDK  
NQVAMNPTNTVFDKR  
NSLESYAFNMK  
NVLIFDLGGGTFDVSILTIEDGIFEVK  
PDEAVAYGAAVQAAILSGDK  
QTQTFTTYSNQPGLIQVYGER  
RFDDAVVQSDMK  
SENVQDLLLDVTPLSLGIETAGGVMTVLIK  
SFYPEEVSSMLTK  
SINPDEAVAYGAAVQAAILSGDK  
SINPDEAVAYGAAVQAAILSGDKSENVQDLLLDVTPL  
SLGIETAGGVMTVLIK  
SQIHDIVLVGGSTR  
STAGDTHLGGEDFDNR  
TLSSSTQASIEIDSLYEGIDFYTSITR

|    |                                    |           |         |    |        |
|----|------------------------------------|-----------|---------|----|--------|
|    | TTPSYVAFTDTER                      |           |         |    |        |
|    | TTYSDNQPGVLIQVYEGER                |           |         |    |        |
|    | TVTNAVVTVPAYFNDSQR                 |           |         |    |        |
|    | VEIANDQGNR                         |           |         |    |        |
| 39 | 14-3-3 protein zeta/delta (P63103) | 27,727.90 | 100.00% | 20 | 79.60% |
|    | sequence:                          |           |         |    |        |
|    | DICNDVLSLLEK                       |           |         |    |        |
|    | DNLTLWTSDTQGDEAEAGEGGEN            |           |         |    |        |
|    | DSTLIMQLLR                         |           |         |    |        |
|    | EMQPTHPIR                          |           |         |    |        |
|    | FLIPNASQAESK                       |           |         |    |        |
|    | GIVDQSQQAYQEAF                     |           |         |    |        |
|    | GIVDQSQQAYQEAFEISK                 |           |         |    |        |
|    | KEMQPTHPIR                         |           |         |    |        |
|    | KGIVDQSQQAYQEAFEISK                |           |         |    |        |
|    | LAEQAER                            |           |         |    |        |
|    | LGLALNFSVFYIEILNSPEK               |           |         |    |        |
|    | MDKNELVQK                          |           |         |    |        |
|    | MKGDYYR                            |           |         |    |        |
|    | NLLSVAYKNVVGAR                     |           |         |    |        |
|    | SQQAYQEAFEISK                      |           |         |    |        |
|    | SVTEQGAELSNEER                     |           |         |    |        |
|    | TAFDEAIAELDTLSEESYK                |           |         |    |        |
|    | TSDTQGDEAEAGEGGEN                  |           |         |    |        |
|    | VVSSIEQK                           |           |         |    |        |
|    | YLAEVAAGDDK                        |           |         |    |        |
|    | YLAEVAAGDDKK                       |           |         |    |        |
| 40 | 14-3-3 protein zeta/delta (P63103) | 27,727.90 | 100.00% | 24 | 83.70% |
|    | sequence:                          |           |         |    |        |
|    | DICNDVLSLLEK                       |           |         |    |        |
|    | DNLTLWTSDTQGDEAEAGEGGEN            |           |         |    |        |
|    | DQSQQAYQEAFEISK                    |           |         |    |        |
|    | DSTLIMQLLR                         |           |         |    |        |
|    | EKIETELR                           |           |         |    |        |
|    | EMQPTHPIR                          |           |         |    |        |

FLIPNASQAESK  
 GIVDQSQQAYQEAF  
 GIVDQSQQAYQEA FEISK  
 KEMQPTHPIR  
 KGIVDQSQQAYQEA FEISK  
 LAEQAER  
 LGLALNFSVFYIEILNSPEK  
 MDKNELVQK  
 NLLSVAYK  
 NLLSVAYKNVVGAR  
 SQQAYQEA FEISK  
 SVTEQGAELSNEER  
 TAFDEAIAELDTLSEESYK  
 TEQGAELSNEER  
 TSDTQGDEAEAGEGGEN  
 VVSSIEQK  
 YDDMAACMK  
 YLAEVAAGDDK  
 YLAEVAAGDDKK

|    |                                                                                                                                                                                                                                                                                                                            |           |         |    |        |
|----|----------------------------------------------------------------------------------------------------------------------------------------------------------------------------------------------------------------------------------------------------------------------------------------------------------------------------|-----------|---------|----|--------|
| 41 | 14-3-3 protein zeta/delta (P63103)<br>sequence:<br>DICNDVLSLLEK<br>DNLTWTSQTGDEAEAGEGGEN<br>DSTLIMQLLR<br>EKIE TELR<br>EMQPTHPIR<br>FDEAIAELDTLSEESYK<br>FLIPNASQAESK<br>GIVDQSQQAYQEAF<br>GIVDQSQQAYQEA FEISK<br>IVDQSQQAYQEA FEISK<br>KEMQPTHPIR<br>KGIVDQSQQAYQEA FEISK<br>LAEQAER<br>LGLALNFSVFYIEILNSPEK<br>MDKNELVQK | 27,727.90 | 100.00% | 26 | 82.90% |
|----|----------------------------------------------------------------------------------------------------------------------------------------------------------------------------------------------------------------------------------------------------------------------------------------------------------------------------|-----------|---------|----|--------|



MKGDYYR  
NLLSVAYK  
NLLSVAYKNVVGAR  
SQQAYQEAFFISK  
SVTEQGAELSNEER  
TAFDEAIAELDTLSEESYK  
TEQGAELSNEER  
TSDTQGDEAEAGEGGEN  
VDQSQQAYQEAFFISK  
VVSSIEQK  
YLAEVAAGDDK  
YLAEVAAGDDKK

ACCEPTED MANUSCRIPT
